# Supplementary figures and images for: Identification and Analysis of a Four-Gene Set for Diagnosing SFTS Virus Infection Based on Machine Learning Methods and Its Association with Immune Cell Infiltration
Source: MDPI journal article supplement (doi:10.3390/v15102126), 2023-10-20

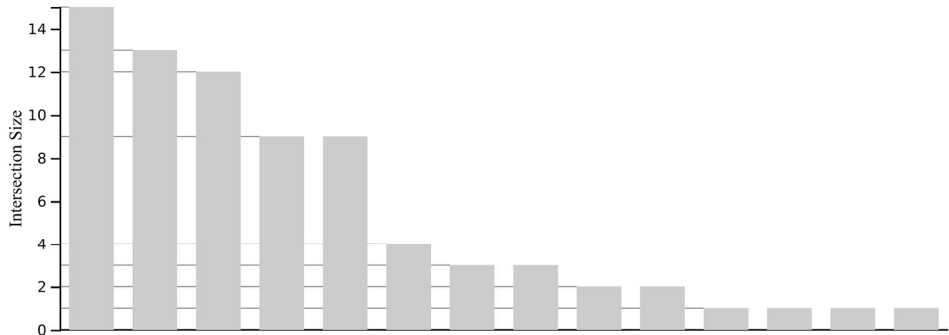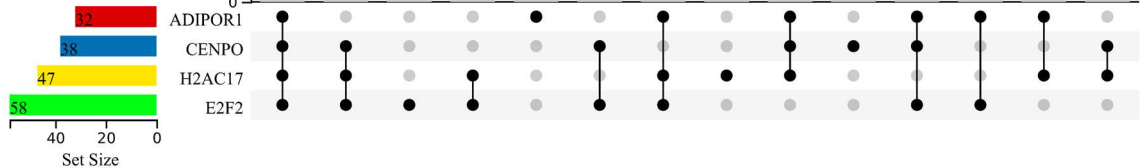

Supplement: s1 [file s1]
